# Supplementary material
Source: PubMed Central journal article supplement (PMC6511484)
Supplement: NIHMS1511088-supplement-1.pdf [file NIHMS1511088-supplement-1.pdf]

**Table S1.** Descriptive characteristics among those missing and not missing urine samples.

|                                                     | <b>Not missing urine sample<br/>(n = 3160)</b> | <b>Missing urine sample (n =<br/>1930)</b> |
|-----------------------------------------------------|------------------------------------------------|--------------------------------------------|
| <b>Characteristic</b>                               | <b>Mean (SD) or %</b>                          | <b>Mean (SD) or %</b>                      |
| Age, years, mean (SD)*                              | 54.3 (12.9)                                    | 57.2 (12.5)                                |
| Female                                              | 62.8                                           | 65.3                                       |
| BMI (kg/m <sup>2</sup> ), mean (SD)                 | 31.7 (7.1)                                     | 31.9 (7.5)                                 |
| Highest level of education completed*               |                                                |                                            |
| Less than high school                               | 17.0                                           | 25.3                                       |
| High school/GED                                     | 37.3                                           | 36.0                                       |
| College degree/certificate                          | 28.9                                           | 23.0                                       |
| Graduate/professional school                        | 16.8                                           | 15.7                                       |
| Household income status*                            |                                                |                                            |
| Low                                                 | 13.4                                           | 18.9                                       |
| Lower-middle                                        | 22.7                                           | 26.8                                       |
| Upper-middle                                        | 31.1                                           | 27.7                                       |
| High                                                | 32.8                                           | 26.6                                       |
| Neighborhood SES z-score, mean (SD)*                | 0.07 (5.0)                                     | -0.9 (4.9)                                 |
| Medical Insurance Access                            | 87.1                                           | 86.1                                       |
| Smoking status*                                     |                                                |                                            |
| Never                                               | 70.9                                           | 63.6                                       |
| Former                                              | 17.3                                           | 20.9                                       |
| Current                                             | 11.8                                           | 15.5                                       |
| Physical activity*                                  |                                                |                                            |
| Poor                                                | 47.0                                           | 53.5                                       |
| Intermediate                                        | 32.5                                           | 29.8                                       |
| Ideal                                               | 20.5                                           | 16.7                                       |
| Nutritional status*                                 |                                                |                                            |
| Poor                                                | 57.9                                           | 64.9                                       |
| Intermediate                                        | 40.9                                           | 34.6                                       |
| Ideal                                               | 1.2                                            | 0.6                                        |
| Alcohol consumption, past 12 months                 | 45.2                                           | 46.8                                       |
| Occupation*                                         |                                                |                                            |
| Management/professional                             | 37.5                                           | 32.6                                       |
| Service                                             | 23.3                                           | 28.1                                       |
| Sales                                               | 18.4                                           | 16.0                                       |
| Other                                               | 20.9                                           | 23.3                                       |
| Hypertension                                        | 59.2                                           | 61.4                                       |
| Diabetes*                                           | 20.6                                           | 24.1                                       |
| Hyperlipidemia                                      | 29.3                                           | 30.2                                       |
| eGFR, mL/min/1.73m <sup>2</sup> , mean (SD)*        | 94.4 (21.3)                                    | 90.5 (22.4)                                |
| Serum creatinine, mg/dL, mean (SD)*                 | 1.0 (0.3)                                      | 1.1 (0.8)                                  |
| Serum Cystatin C, mg/L, mean (SD)*                  | 0.7 (0.3)                                      | 0.8 (.5)                                   |
| PM <sub>2.5</sub> 1-year mean (µg/m <sup>3</sup> )* | 12.1 (0.6)                                     | 12.4 (0.6)                                 |
| PM <sub>2.5</sub> 3-year mean (µg/m <sup>3</sup> )* | 12.3 (0.4)                                     | 12.5 (0.5)                                 |
| O <sub>3</sub> 1-year mean (ppb)*                   | 40.1 (1.7)                                     | 40.4 (3.8)                                 |
| O <sub>3</sub> 3-year mean (ppb)*                   | 40.8 (1.5)                                     | 40.4 (3.7)                                 |

\*p&lt;0.05

|                                             | <b>Pollutant</b>               |                                |                             |                             |
|---------------------------------------------|--------------------------------|--------------------------------|-----------------------------|-----------------------------|
|                                             | <b>1-year PM<sub>2.5</sub></b> | <b>3-year PM<sub>2.5</sub></b> | <b>1-year O<sub>3</sub></b> | <b>3-year O<sub>3</sub></b> |
|                                             | Beta (95% CI)                  | Beta (95% CI)                  | Beta (95% CI)               | Beta (95% CI)               |
| <b>eGFR &lt;60 mL/min/1.73m<sup>2</sup></b> |                                |                                |                             |                             |
| Model 1 <sup>a</sup>                        | 1.32 (1.09, 1.60)*             | 1.56 (1.24, 1.97)*             | 1.01 (0.95, 1.07)           | 1.00 (0.94, 1.06)           |
| Model 2 <sup>b</sup>                        | 1.00 (0.83, 1.22)              | 1.14 (0.91, 1.42)              | 1.01 (0.96, 1.06)           | 1.02 (0.96, 1.08)           |
| Model 3 <sup>c</sup>                        | 1.00 (0.83, 1.20)              | 1.12 (0.90, 1.39)              | 1.00 (0.95, 1.05)           | 1.01 (0.95, 1.07)           |
| Model 4 <sup>d</sup>                        | 1.08 (0.85, 1.38)              | 1.26 (0.93, 1.70)              | 1.06 (0.99, 1.13)           | 1.07 (0.99, 1.16)           |
| Model 5 <sup>e</sup>                        | 1.00 (0.82, 1.22)              | 1.13 (0.91, 1.42)              | 1.01 (0.95, 1.06)           | 1.02 (0.96, 1.08)           |
| <b>UACR &gt;30 mg/g</b>                     |                                |                                |                             |                             |
| Model 1 <sup>a</sup>                        | 1.06 (0.87, 1.30)              | 1.05 (0.81, 1.36)              | 1.02 (0.96, 1.09)           | 1.01 (0.94, 1.08)           |
| Model 2 <sup>b</sup>                        | 0.91 (0.73, 1.12)              | 0.83 (0.64, 1.06)              | 0.99 (0.94, 1.05)           | 1.00 (0.94, 1.07)           |
| Model 3 <sup>c</sup>                        | 0.89 (0.72, 1.10)              | 0.78 (0.60, 1.02)              | 1.00 (0.94, 1.06)           | 1.00 (0.94, 1.07)           |
| Model 4 <sup>d</sup>                        | 1.02 (0.81, 1.29)              | 0.94 (0.68, 1.30)              | 1.02 (0.94, 1.10)           | 1.03 (0.94, 1.12)           |
| Model 5 <sup>e</sup>                        | 0.90 (0.72, 1.13)              | 0.82 (0.64, 1.05)              | 1.01 (0.94, 1.07)           | 1.01 (0.94, 1.08)           |
| <b>Serum Creatinine &gt;0.9 mg/dL</b>       |                                |                                |                             |                             |
| Model 1 <sup>a</sup>                        | 0.95 (0.85, 1.05)              | 0.89 (0.75, 1.04)              | 1.01 (0.98, 1.04)           | 1.01 (0.98, 1.04)           |
| Model 2 <sup>b</sup>                        | 0.86 (0.75, 0.98)*             | 0.83 (0.68, 1.02)              | 1.02 (0.99, 1.06)           | 1.03 (1.00, 1.07)           |
| Model 3 <sup>c</sup>                        | 0.86 (0.76, 0.98)*             | 0.84 (0.68, 1.02)              | 1.02 (0.99, 1.05)           | 1.03 (1.00, 1.07)           |
| Model 4 <sup>d</sup>                        | 0.87 (0.75, 1.00)              | 0.85 (0.68, 1.05)              | 1.03 (0.99, 1.07)           | 1.03 (0.99, 1.08)           |
| Model 5 <sup>e</sup>                        | 0.84 (0.74, 0.96)*             | 0.83 (0.68, 1.02)              | 1.03 (1.00, 1.06)           | 1.03 (1.00, 1.07)           |
| <b>Cystatin C &gt;0.71 mg/g</b>             |                                |                                |                             |                             |
| Model 1 <sup>a</sup>                        | 1.29 (1.12, 1.48)*             | 1.46 (1.22, 1.74)              | 1.00 (0.98, 1.02)           | 0.98 (0.96, 1.00)           |
| Model 2 <sup>b</sup>                        | 0.98 (0.86, 1.12)              | 1.03 (0.89, 1.18)              | 1.00 (0.98, 1.03)           | 1.00 (0.98, 1.03)           |
| Model 3 <sup>c</sup>                        | 1.00 (0.88, 1.14)              | 1.04 (0.91, 1.20)              | 1.00 (0.98, 1.03)           | 1.00 (0.97, 1.02)           |
| Model 4 <sup>d</sup>                        | 1.04 (0.90, 1.21)              | 1.16 (0.99, 1.37)              | 1.01 (0.98, 1.04)           | 1.01 (0.98, 1.04)           |
| Model 5 <sup>e</sup>                        | 0.98 (0.86, 1.11)              | 1.03 (0.89, 1.18)              | 1.00 (0.98, 1.03)           | 1.00 (0.98, 1.03)           |

**Table S2.** Results from logistic regression of dichotomized outcomes.

<sup>a</sup>Model 1 unadjusted, accounting for clustering on census tract

<sup>b</sup>Model 2 adjusted for age, sex, BMI, education level, NSES z-score, medical insurance, smoking status, physical activity, alcohol consumption, occupation, and hyperlipidemia, accounting for clustering by census tract

<sup>c</sup>Model 3 adjusted for all covariates in model 2, plus use of non-steroidal anti-inflammatory drugs, diuretic medication, and statin medications, accounting for clustering by census tract

<sup>d</sup>Model 4 adjusted for all covariates in model 2, plus diabetes and hypertension, accounting for clustering by census tract.

<sup>e</sup>Model 5 adjusted for all covariates in model 2, plus the other pollutant, O<sub>3</sub> in PM<sub>2.5</sub> models, and PM<sub>2.5</sub> in O<sub>3</sub> models, accounting for clustering by census tract  
\*p<0.05

**Table S3.** Results from linear regression of residential distance to A1 or A2 road and markers of renal function (N = 5090).

|                         | <b>Residential distance to A1/A2 road</b> |                         |                          |                        | <b>Log-transformed distance to road (continuous)</b> |
|-------------------------|-------------------------------------------|-------------------------|--------------------------|------------------------|------------------------------------------------------|
|                         | <b>&lt;150m (n=111)</b>                   | <b>150-299m (n=166)</b> | <b>300-999m (n=1210)</b> | <b>≥1000m (n=3603)</b> |                                                      |
|                         | Beta (95% CI)                             | Beta (95% CI)           | Beta (95% CI)            | Beta (95% CI)          |                                                      |
| <b>eGFR</b>             |                                           |                         |                          | REF                    |                                                      |
| Model 1 <sup>a</sup>    | -1.7 (-6.3, 2.8)                          | -0.09 (-3.7, 3.5)       | 1.1 (-1.4, 3.5)          |                        | -0.3 (-1.2, 0.7)                                     |
| Model 2 <sup>b</sup>    | -1.4 (-4.7, 2.0)                          | 3.2 (1.2, 5.2)*         | 0.5 (-0.6, 1.6)          |                        | -0.3 (-0.8, 0.2)                                     |
| Model 3 <sup>c</sup>    | 0.4 (-4.5, 5.4)                           | 2.8 (-0.09, 5.8)        | -0.3 (-2.2, 1.6)         |                        | -0.3 (-1.0, 0.3)                                     |
| Model 4 <sup>d</sup>    | -1.7 (-5.1, 1.7)                          | 3.2 (1.2, 5.3)*         | 0.4 (-0.7, 1.5)          |                        | -0.3 (-0.8, 0.2)                                     |
| <b>Log UACR</b>         |                                           |                         |                          | REF                    |                                                      |
| Model 1 <sup>a</sup>    | 0.1 (-0.2, 0.4)                           | -0.2 (-0.4, -0.003)*    | -0.1 (-0.2, 0.002)*      |                        | 0.02 (-0.03, 0.07)                                   |
| Model 2 <sup>b</sup>    | 0.1 (-0.2, 0.4)                           | -0.3 (-0.4, -0.1)*      | -0.08 (-0.2, 0.03)       |                        | 0.01 (-0.03, 0.06)                                   |
| Model 3 <sup>c</sup>    | 0.1 (-0.4, 0.7)                           | -0.3 (-0.5, -0.07)*     | -0.04 (-0.2, 0.1)        |                        | -0.01 (-0.09, 0.06)                                  |
| Model 4 <sup>d</sup>    | 0.2 (-0.08, 0.5)                          | -0.2 (-0.4, -0.1)*      | -0.07 (-0.2, 0.03)       |                        | 0.003 (-0.04, 0.05)                                  |
| <b>Serum Creatinine</b> |                                           |                         |                          | REF                    |                                                      |
| Model 1 <sup>a</sup>    | 0.04 (-0.09, 0.2)                         | -0.04 (-0.08, -0.0005)* | 0.007 (-0.04, 0.05)      |                        | -0.003 (-0.02, 0.01)                                 |
| Model 2 <sup>b</sup>    | 0.05 (-0.09, 0.2)                         | -0.06 (-0.09, -0.03)*   | 0.006 (-0.03, 0.04)      |                        | -0.002 (-0.02, 0.01)                                 |
| Model 3 <sup>c</sup>    | -0.04 (-0.1, 0.01)                        | -0.07 (-0.1, -0.02)*    | 0.02 (-0.03, 0.08)       |                        | 0.005 (-0.008, 0.02)                                 |
| Model 4 <sup>d</sup>    | 0.06 (-0.08, 0.2)                         | -0.06 (-0.08, -0.03)*   | 0.008 (-0.03, 0.04)      |                        | -0.004 (-0.02, 0.01)                                 |
| <b>Cystatin C</b>       |                                           |                         |                          | REF                    |                                                      |
| Model 1 <sup>a</sup>    | 0.02 (-0.04, 0.07)                        | -0.04 (-0.07, -0.008)*  | -0.006 (-0.04, 0.03)     |                        | 0.002 (-0.009, 0.01)                                 |
| Model 2 <sup>b</sup>    | 0.003 (-0.07, 0.08)                       | -0.05 (-0.1, 0.004)     | 0.005 (-0.02, 0.03)      |                        | 0.002 (-0.006, 0.009)                                |
| Model 3 <sup>c</sup>    | -0.03 (-0.09, 0.02)                       | -0.05 (-0.09, -0.02)*   | 0.02 (-0.02, 0.06)       |                        | 0.004 (-0.007, 0.02)                                 |
| Model 4 <sup>d</sup>    | 0.01 (-0.05, 0.07)                        | -0.05 (-0.08, -0.03)*   | 0.007 (-0.02, 0.03)      |                        | 0.0004 (-0.007, 0.008)                               |

<sup>a</sup>Model 1 unadjusted, accounting for clustering on census tract

<sup>b</sup>Model 2 adjusted for age, sex, BMI, education level, NSES z-score, medical insurance, smoking status, physical activity, alcohol consumption, occupation, and hyperlipidemia, accounting for clustering by census tract

<sup>c</sup>Model 3 adjusted for all covariates in model 2, plus use of non-steroidal anti-inflammatory drugs, diuretic medication, and statin medications, accounting for clustering by census tract

<sup>d</sup>Model 4 adjusted for all covariates in model 2, plus diabetes and hypertension, accounting for clustering by census tract.

\*p < 0.05

**Table S4.** Results from linear regression of residential distance to A1 road and markers of renal function.

|                                              | <b>Residential distance to A1 road</b> |                        |                       |                        | <b>Log-transformed distance to road (continuous)</b> |
|----------------------------------------------|----------------------------------------|------------------------|-----------------------|------------------------|------------------------------------------------------|
|                                              | <b>&lt;150m (n=35)</b>                 | <b>150-299m (n=98)</b> | <b>≥300m (n=835)</b>  | <b>≥1000m (n=4122)</b> |                                                      |
|                                              | Beta (95% CI)                          | Beta (95% CI)          | Beta (95% CI)         | REF                    |                                                      |
| <b>eGFR</b>                                  |                                        |                        |                       | REF                    |                                                      |
| Model 1 <sup>a</sup>                         | -4.5 (-11.0, 2.1)                      | -0.3 (-4.3, 3.8)       | 2.1 (-0.3, 4.6)       |                        | -0.1 (-1.1, 0.9)                                     |
| Model 2 <sup>b</sup>                         | -2.1 (-8.9, 4.7)                       | 2.9 (0.4, 5.4)*        | 0.5 (-0.5, 1.6)       |                        | -0.5 (-1.0, 0.05)                                    |
| Model 3 <sup>c</sup>                         | 0.5 (-8.2, 9.2)                        | 3.1 (0.2, 6.1)*        | -0.4 (-2.1, 1.2)      |                        | -0.1 (-0.9, 0.7)                                     |
| Model 4 <sup>d</sup>                         | -2.2 (-8.9, 4.5)                       | 3.1 (0.6, 5.6)*        | 0.4 (-0.7, 1.5)       |                        | -0.4 (-0.9, 0.1)                                     |
| <b>Log of urine albumin/creatinine ratio</b> |                                        |                        |                       |                        |                                                      |
| Model 1 <sup>a</sup>                         | 0.5 (-0.03, 1.0)                       | -0.1 (-0.5, 0.2)       | -0.09 (-0.2, 0.04)    |                        | -0.002 (-0.06, 0.06)                                 |
| Model 2 <sup>b</sup>                         | 0.4 (-0.2, 1.0)                        | -0.2 (-0.4, 0.04)      | -0.03 (-0.2, 0.1)     |                        | 0.0007 (-0.04, 0.04)                                 |
| Model 3 <sup>c</sup>                         | 0.1 (-0.8, 1.0)                        | -0.3 (-0.6, -0.06)     | -0.01 (-0.2, 0.2)     |                        | 0.008 (-0.06, 0.08)                                  |
| Model 4 <sup>d</sup>                         | 0.5 (-0.009, 0.9)                      | -0.2 (-0.4, 0.02)      | -0.009 (-0.1, 0.1)    |                        | -0.007 (-0.05, 0.03)                                 |
| <b>Serum Creatinine</b>                      |                                        |                        |                       | REF                    |                                                      |
| Model 1 <sup>a</sup>                         | -0.02 (-0.09, 0.06)                    | -0.03 (-0.06, 0.009)   | -0.02 (-0.06, 0.03)   |                        | 0.01 (-0.004, 0.03)                                  |
| Model 2 <sup>b</sup>                         | -0.01 (-0.09, 0.07)                    | -0.06 (-0.09, 0.02)    | -0.01 (-0.04, 0.02)   |                        | 0.01 (-0.002, 0.02)                                  |
| Model 3 <sup>c</sup>                         | -0.06 (-0.1, 0.02)                     | -0.06 (-0.1, -0.01)*   | -0.005 (-0.04, 0.03)  |                        | 0.003 (-0.02, 0.02)                                  |
| Model 4 <sup>d</sup>                         | -0.006 (-0.08, 0.07)                   | --0.06 (-0.09, -0.02)* | -0.009 (-0.04, 0.02)  |                        | 0.008 (-0.004, 0.02)                                 |
| <b>Cystatin C</b>                            |                                        |                        |                       | REF                    |                                                      |
| Model 1 <sup>a</sup>                         | 0.03 (-0.03, 0.08)                     | -0.04 (-0.08, -0.007)  | -0.03 (-0.05, -0.004) |                        | 0.007 (-0.004, 0.02)                                 |
| Model 2 <sup>b</sup>                         | -0.02 (-0.1, 0.1)                      | -0.05 (-0.1, 0.02)     | -0.009 (-0.04, 0.02)  |                        | 0.008 (0.0005, 0.02)                                 |
| Model 3 <sup>c</sup>                         | -0.04 (-0.1, 0.05)                     | -0.06 (-0.1, -0.02)    | -0.003 (-0.03, 0.02)  |                        | 0.003 (-0.009, 0.02)                                 |
| Model 4 <sup>d</sup>                         | -0.01 (-0.07, 0.05)                    | -0.06 (-0.08, -0.03)*  | -0.006 (-0.02, 0.01)  |                        | 0.006 (-0.0009, 0.01)                                |

<sup>a</sup>Model 1 unadjusted, accounting for clustering on census tract

<sup>b</sup>Model 2 adjusted for age, sex, BMI, education level, NSES z-score, medical insurance, smoking status, physical activity, alcohol consumption, occupation, and hyperlipidemia, accounting for clustering by census tract

<sup>c</sup>Model 3 adjusted for all covariates in model 2, plus use of non-steroidal anti-inflammatory drugs, diuretic medication, and statin medications, accounting for clustering by census tract

<sup>d</sup>Model 4 adjusted for all covariates in model 2, plus diabetes and hypertension, accounting for clustering by census tract.

\*p < 0.05

**Table S5.** Correlation matrix between PM<sub>2.5</sub> and O<sub>3</sub>

|                                | <b>1-year PM<sub>2.5</sub></b> | <b>3-year PM<sub>2.5</sub></b> | <b>1-year O<sub>3</sub></b> | <b>3-year O<sub>3</sub></b> |
|--------------------------------|--------------------------------|--------------------------------|-----------------------------|-----------------------------|
| <b>1-year PM<sub>2.5</sub></b> | 1.00                           |                                |                             |                             |
| <b>3-year PM<sub>2.5</sub></b> | 0.86                           | 1.00                           |                             |                             |
| <b>1-year O<sub>3</sub></b>    | 0.12                           | 0.044                          | 1.00                        |                             |
| <b>3-year O<sub>3</sub></b>    | -0.069                         | -0.033                         | 0.94                        | 1.00                        |
